# Supplementary material for: The Relationship Between Body Iron Status, Iron Intake And Gestational Diabetes: A Systematic Review and Meta-Analysis
Source: PubMed Central journal article supplement (PMC4718241; doi:10.1097/md.0000000000002383), 2016-01-15
Supplement: medi-95-e2383-s001.pdf [file medi-95-e2383-s001.pdf]

**S1 Figure.** Sensitivity analyses SMD of ferritin in all eligible ferritin case-control studies, the analysis was performed using a random-effects model.

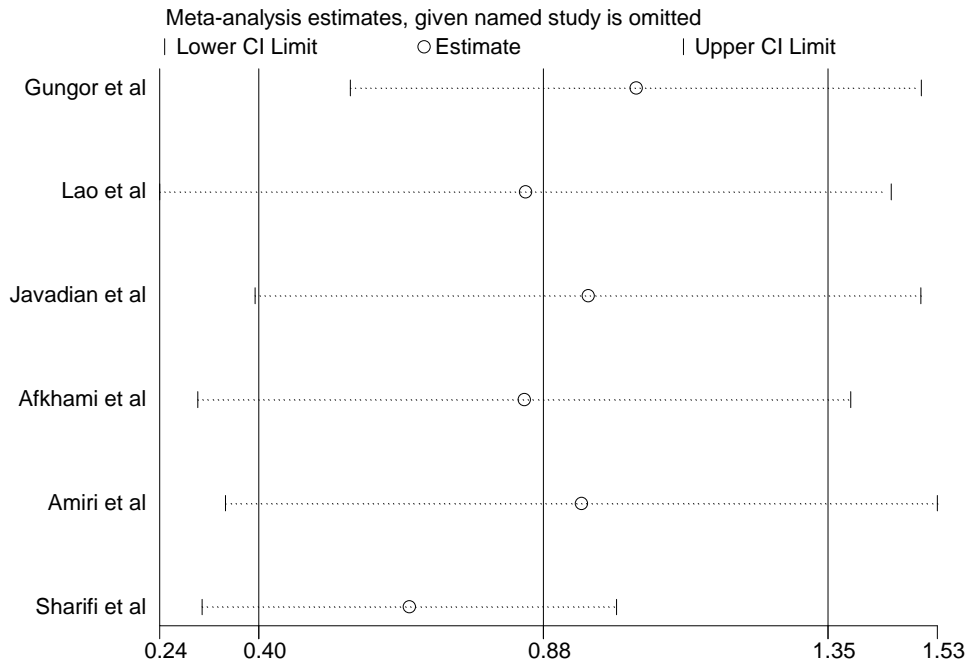

Figure 1. Begg's test for visual assessment of publication bias for six case-control studies of ferritin in meta-analysis ( $p=0.573$ ).

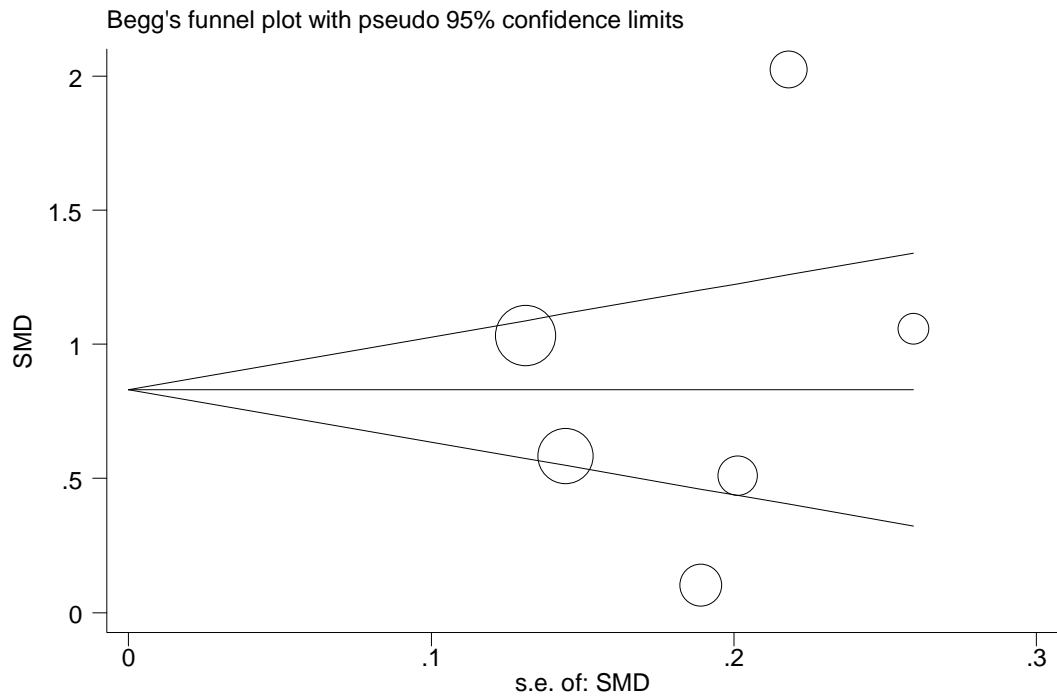

Figure 2. Egger's test for visual assessment of publication bias for six case-control studies of ferritin in meta-analysis ( $p=0.744$ ).

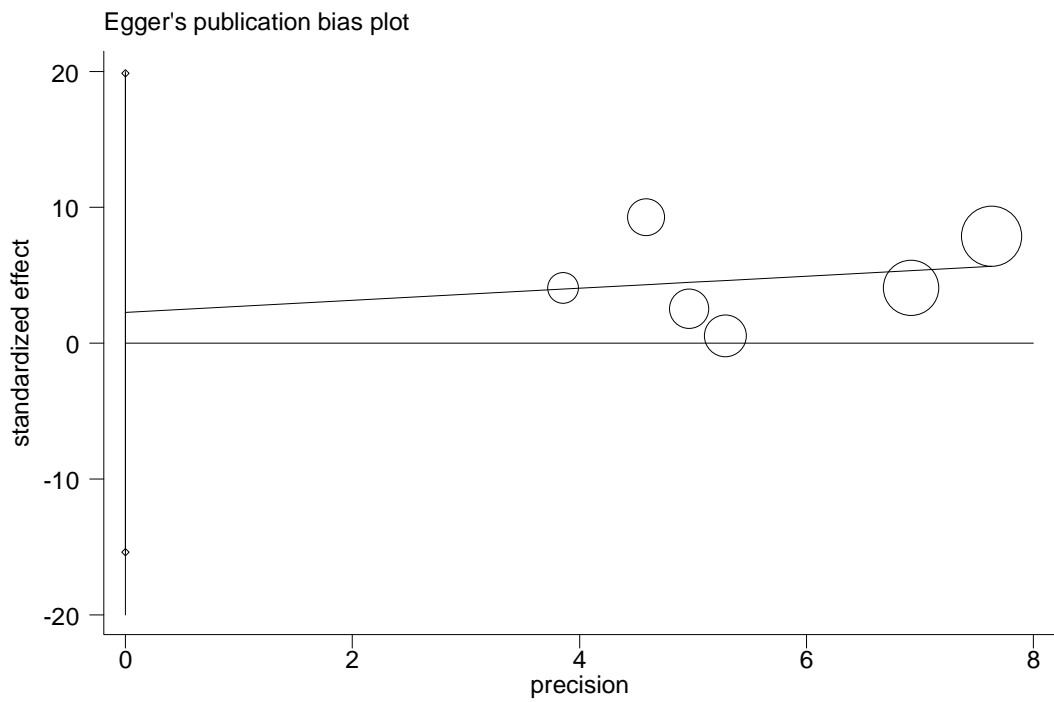

Figure 3. Begg's test for visual assessment of publication bias for four prospective cohort studies of ferritin in meta-analysis ( $p=1.000$ ).

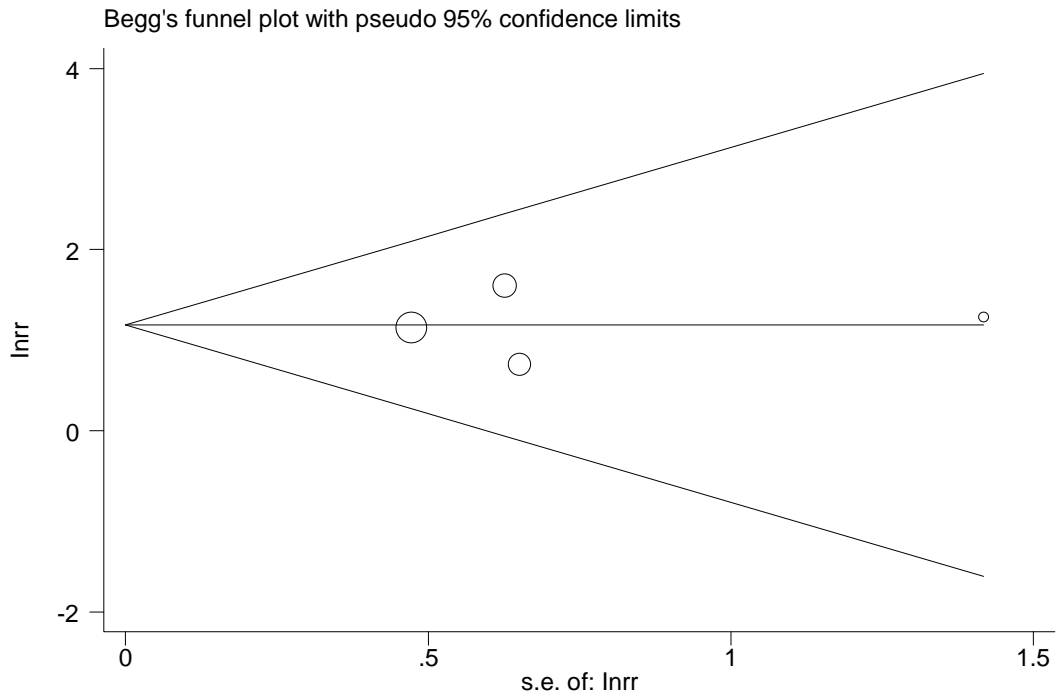

Figure 4. Egger's test for visual assessment of publication bias for six case-control studies of ferritin in meta-analysis ( $p=0.953$ ).

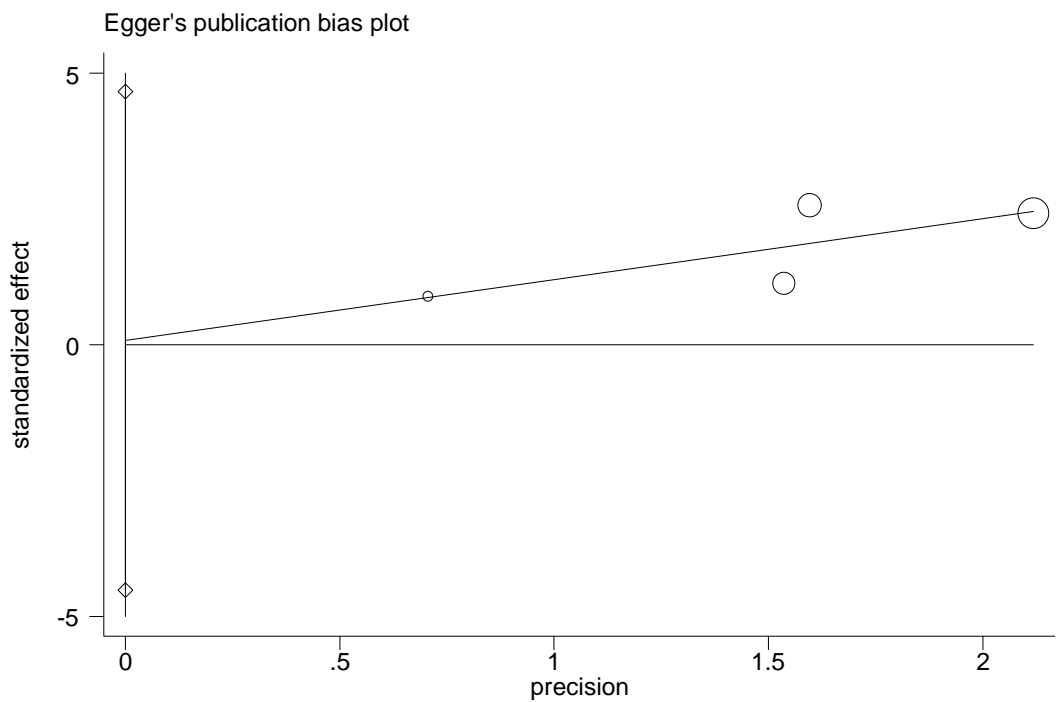

Figure 5. Begg's test for visual assessment of publication bias for three prospective cohort studies of dietary total iron in meta-analysis ( $p=0.117$ ).

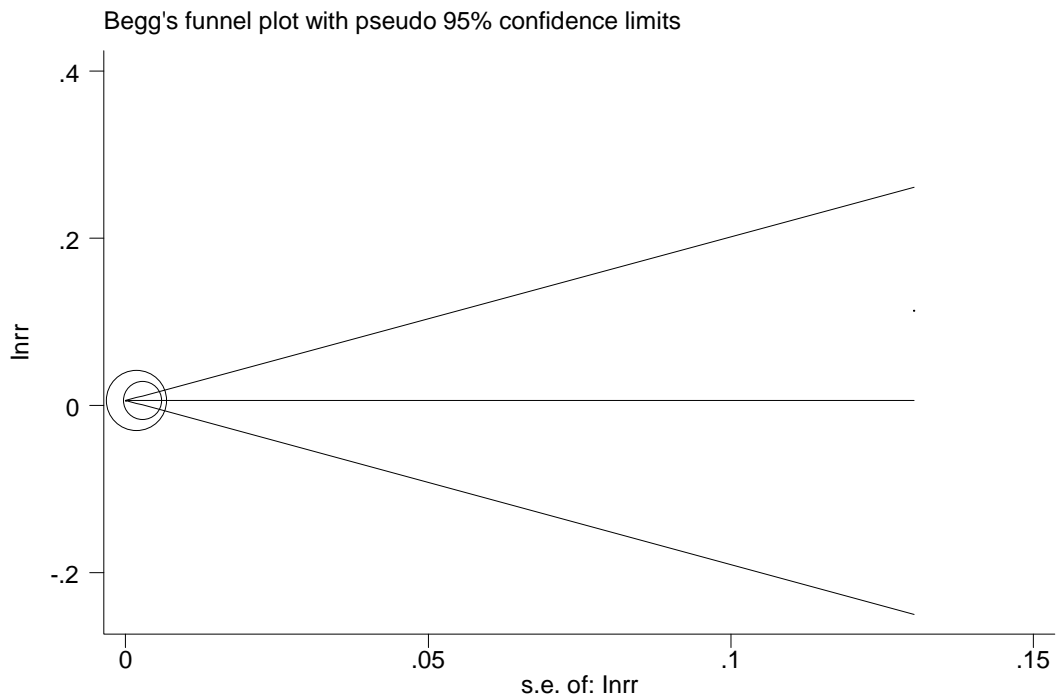

Figure 6. Egger's test for visual assessment of publication bias for three prospective cohort studies of dietary total iron in meta-analysis ( $p=0.192$ ).

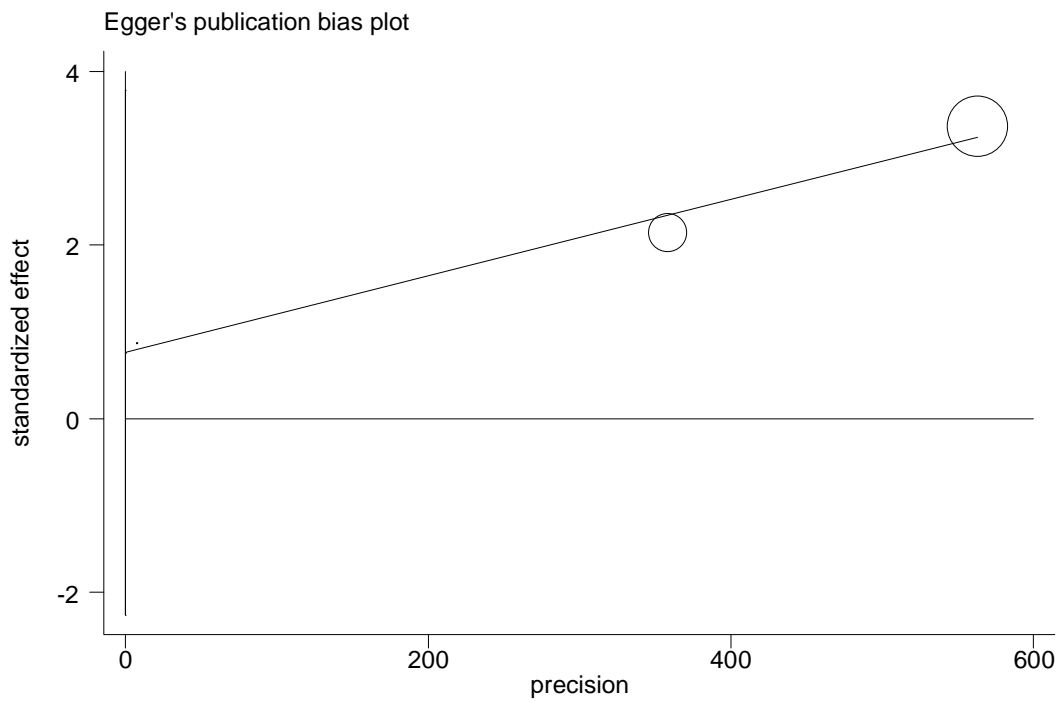

**S1 Table.1.** Result of quality assessment of prospective cohort studies

| Study                        | Selection                              |                                        |                              |                        | Comparability                              | Outcome               |                     |                          | Total points |
|------------------------------|----------------------------------------|----------------------------------------|------------------------------|------------------------|--------------------------------------------|-----------------------|---------------------|--------------------------|--------------|
|                              | 1) Representativeness of export cohort | 2) Selection of the non exposed cohort | 3) Ascertainment of exposure | 4) No outcome at start | 1) Comparability of the design or analysis | 1) Outcome assessment | 2) Follow up length | 3) Adequacy of follow up |              |
| Behboudi-Gandevani, S (2013) | 1                                      | 1                                      | 1                            | 1                      | 2                                          | 1                     | 1                   | 1                        | 9            |
| Bowers, K (2011)             | 0                                      | 1                                      | 1                            | 1                      | 2                                          | 1                     | 1                   | 1                        | 8            |
| Helin, A (2012)              | 1                                      | 1                                      | 1                            | 1                      | 2                                          | 1                     | 1                   | 1                        | 9            |
| Tarim, E. (2004)             | 0                                      | 0                                      | 0                            | 1                      | 1                                          | 1                     | 1                   | 1                        | 5            |
| Zein, S (2015)               | 1                                      | 1                                      | 1                            | 1                      | 2                                          | 1                     | 1                   | 1                        | 9            |
| Qiu, C (2011)                | 1                                      | 1                                      | 1                            | 1                      | 2                                          | 1                     | 1                   | 1                        | 9            |
| Soubasi, V. (2010)           | 1                                      | 1                                      | 1                            | 1                      | 1                                          | 1                     | 1                   | 1                        | 8            |
| Chen, X.(2006)               | 1                                      | 1                                      | 1                            | 1                      | 1                                          | 1                     | 1                   | 1                        | 8            |

**S1 Table.2.** Result of quality assessment of case-control studies

| Study                      | Selection                           |                                    |                          |                           | Comparability                          | Exposure                     |                                                        |                          | Total points |
|----------------------------|-------------------------------------|------------------------------------|--------------------------|---------------------------|----------------------------------------|------------------------------|--------------------------------------------------------|--------------------------|--------------|
|                            | 1) Is the case definition adequate? | 2) Representativeness of the cases | 3) Selection of Controls | 4) Definition of Controls | 1) Comparability of cases and controls | 1) Ascertainment of exposure | 2) Same method of ascertainment for cases and controls | 3) Adequacy of follow up |              |
| Derbent. AU (2013)         | 1                                   | 1                                  | 0                        | 1                         | 0                                      | 1                            | 1                                                      | 1                        | 6            |
| Sharifi. F (2010)          | 1                                   | 1                                  | 1                        | 1                         | 2                                      | 1                            | 1                                                      | 1                        | 9            |
| Gungor. ES (2007)          | 1                                   | 1                                  | 0                        | 1                         | 0                                      | 1                            | 1                                                      | 1                        | 6            |
| Afkhami-Ardekani, M (2009) | 1                                   | 1                                  | 0                        | 1                         | 1.5                                    | 1                            | 1                                                      | 0                        | 6.5          |
| Lao. TT (2001)             | 1                                   | 1                                  | 0                        | 1                         | 0.5                                    | 1                            | 1                                                      | 1                        | 6.5          |
| Javadian. P (2011)         | 1                                   | 1                                  | 0                        | 1                         | 1.5                                    | 1                            | 1                                                      | 1                        | 7.5          |
| Amiri. FN (2013)           | 1                                   | 1                                  | 0                        | 1                         | 1                                      | 1                            | 1                                                      | 0                        | 6            |
